# Supplementary material for: A type 1 diabetes prediction model has utility across multiple screening settings with recalibration
Source: Research Square preprint supplement (doi:10.21203/rs.3.rs-5773430/v1), 2025-02-06
Supplement: Supplementary file 1 [file 077212bc5f7e37ff03e1dd64.docx]

**Supplementary Methods**

TrialNet Genotyping:

We imputed 32 non-HLA SNPs with a median R2 of 0.997 (min = 0.858 and max = 0.999) using the TOPMed Imputation Server with the multi-ethnic TOPMed reference panel which includes 97,256 reference samples and > 308 million genetic variants. We also imputed 5 SNPs in the HLA region (rs72848653 (R2 = 0.999), rs9266268 (R2 = 0.999), rs16899379 (R2 = 0.998), rs2524277 (R2 = 0.995), and rs9268500 (R2 = 0.925)) using the Michigan Imputation Server with the high-resolution HLA reference panel spanning five global populations (n = 21,546) based on whole-genome sequencing data.

**Statistical Analysis**

Landmark Modelling:

We used a landmark modelling approach that considers the information available at a specific age to predict future risk, allowing for scores to be updated when new information is available(9,19). The landmark approach is convenient because it can be applied in longitudinal and cross-sectional studies. Baseline variables for each landmark model were defined as the closest drawing to landmark age but no further than 3 months prior to or after this age.

Due to differences in cohort selection protocol, landmark models for TrialNet participants aged 7 and younger used the TEDDY age 4 model, with all models performing similarly (supplementary figure 2), and the age 7 model applied for participants older than 7.

Stratified Model:

If the predictor violating the PH assumption is a categorical variable, the potential problem can be addressed by stratifying the model by the categorical predictor that violates the assumption. Then, data are stratified into subgroups and the Cox model is applied in each subgroup so that the hazard function of the individual *i* in group *g* at time *t* is given by,

Where is the hazard function of all individuals in group *g*, the coefficient in group *g* the variables of individual *i*.
