# Supplementary material for: A type 1 diabetes prediction model has utility across multiple screening settings with recalibration
Source: Research Square preprint supplement (doi:10.21203/rs.3.rs-5773430/v1), 2025-02-06
Supplement: Supplementary file 2 [file 225e1475cac1ddb565e3ec9a.docx]

| **Age at Screening** | **Autoantibody Status** | **5-year horizon** | |
| --- | --- | --- | --- |
| **Low Genetic Risk** | **High Genetic Risk** |
| Between 1 and 7 | 1 | 0.16 [0.12 – 0.20] | 0.42 [0.34 – 0.49] |
| 2 | 0.39 [0.33 – 0.44] | 0.62 [0.55 – 0.68] |
| 3 | 0.68 [0.61 – 0.73] | 0.62 [0.55 – 0.68] |
| Between 8 and 17 | 1 | 0.22 [0.19 – 0.26] | 0.30 [0.25 – 0.35] |
| 2 | 0.44 [0.38 – 0.49] | 0.54 [0.48 – 0.59] |
| 3 | 0.55 [0.48 – 0.62] | 0.62 [0.54 – 0.68] |
| Over 18 | 1 | 0.10 [0.08 – 0.13] | 0.14 [0.10 – 0.19] |
| 2 | 0.33 [0.24 – 0.41] | 0.41 [0.30 – 0.51] |
| 3 | 0.33 [0.24 – 0.41] | 0.41 [0.30 – 0.51] |
