# Supplementary material for: A type 1 diabetes prediction model has utility across multiple screening settings with recalibration
Source: Research Square preprint supplement (doi:10.21203/rs.3.rs-5773430/v1), 2025-02-06
Supplement: Supplementary file 3 [file 329b31f01e50739a972ed43b.docx]

| **AB** | **Study** | **Estimated 5-year T1D-free probability [95%CI]** |
| --- | --- | --- |
| **1** | TEDDY | 89% [84%, 94%] |
| TrialNet | 81% [79%, 83%] |
| **2** | TEDDY | 58% [48%, 70%] |
| TrialNet | 52% [49%, 56%] |
| **3** | TEDDY | 33% [24%, 45%] |
| TrialNet | 39% [35%, 44%] |
